# Supplementary material
Source: PubMed Central journal article supplement (PMC3463846)

Figure 1B

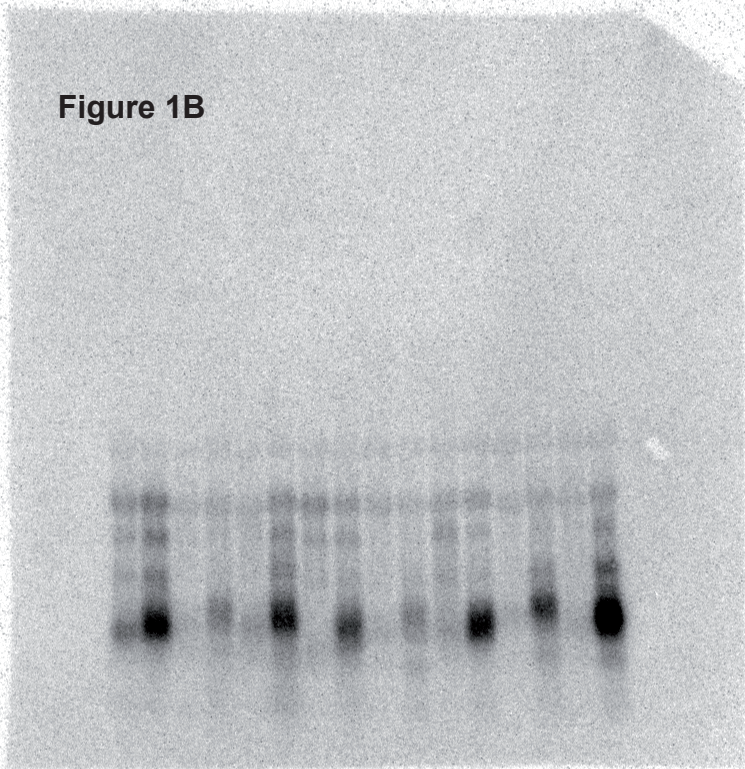

Figure 1B: loading control *ACT1*

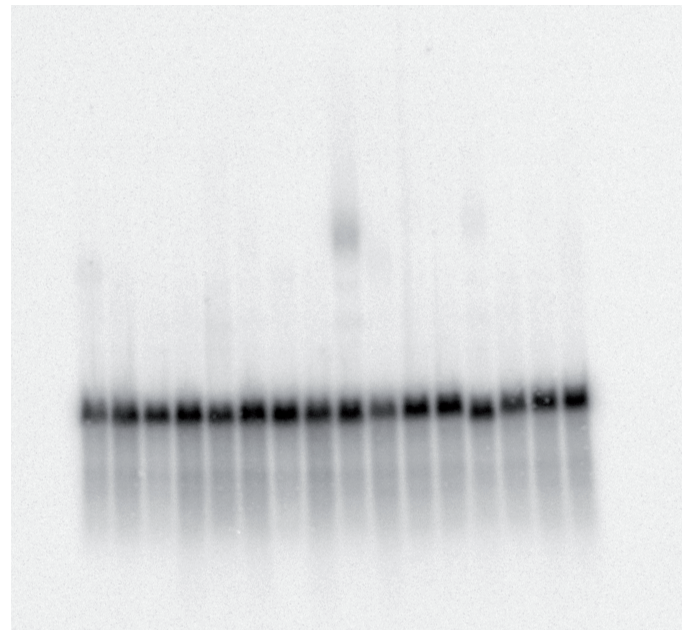

Figure 1C

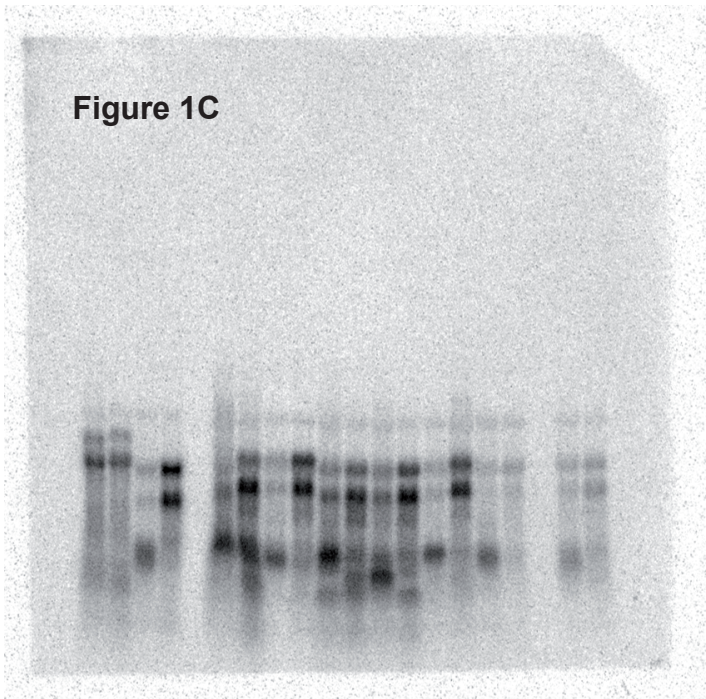

Figure 1C: loading control *U2*

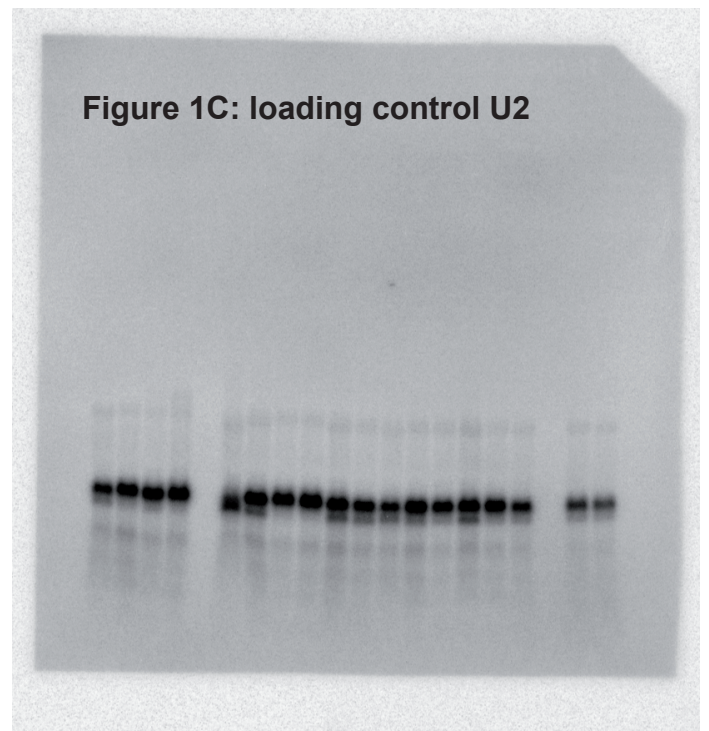

Supplement: emboj2012237s2.pdf [file emboj2012237s2.pdf]

**Figure 3B**

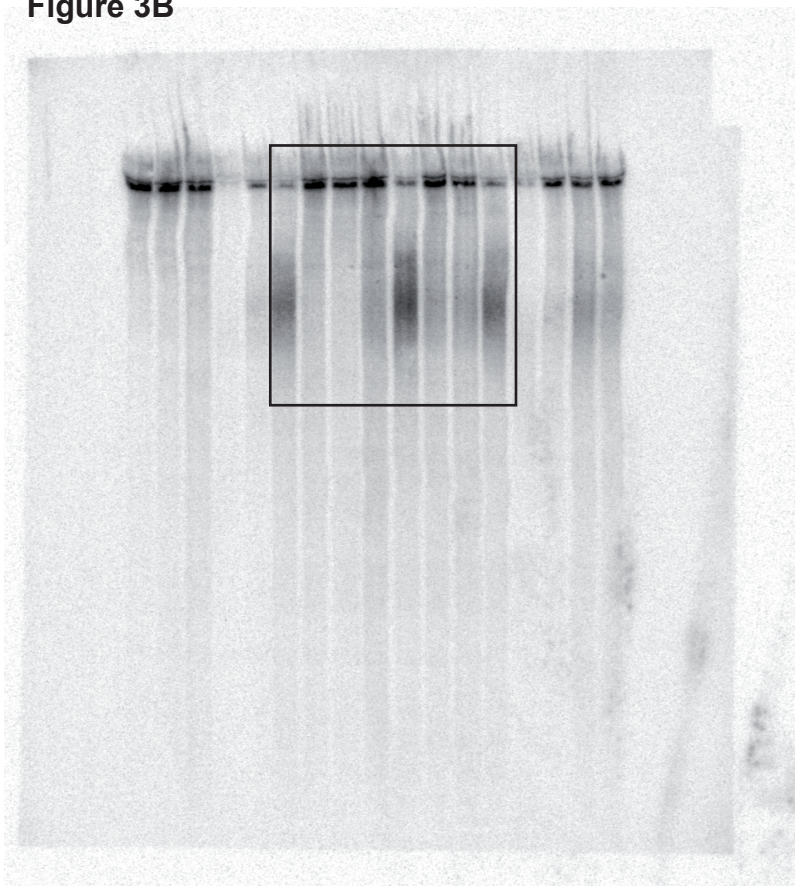

**Figure 3B: loading control U4**

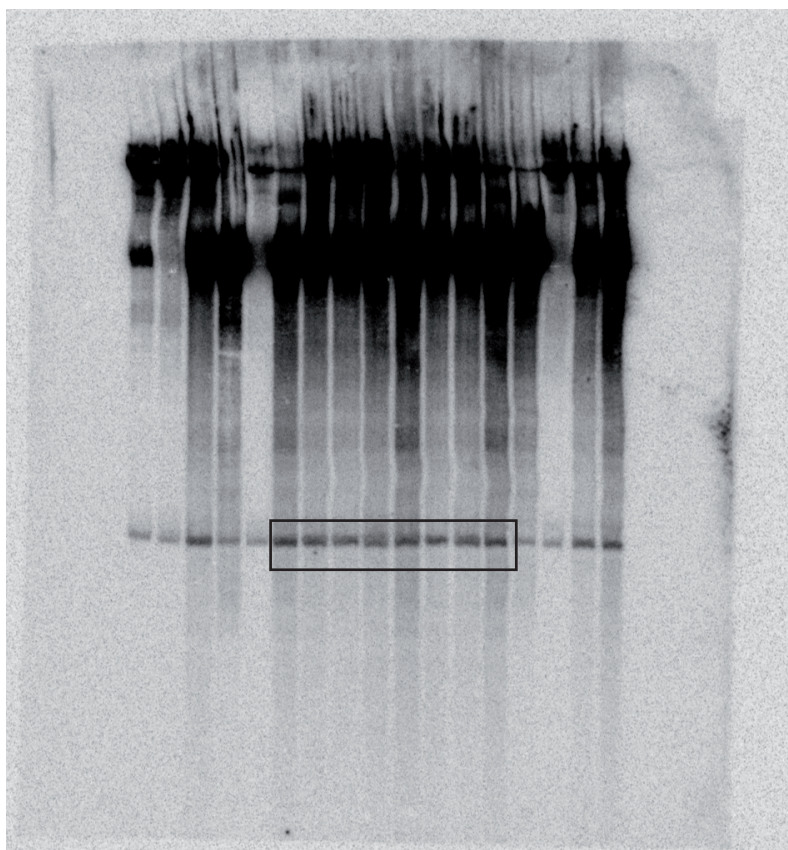

Supplement: emboj2012237s3.pdf [file emboj2012237s3.pdf]

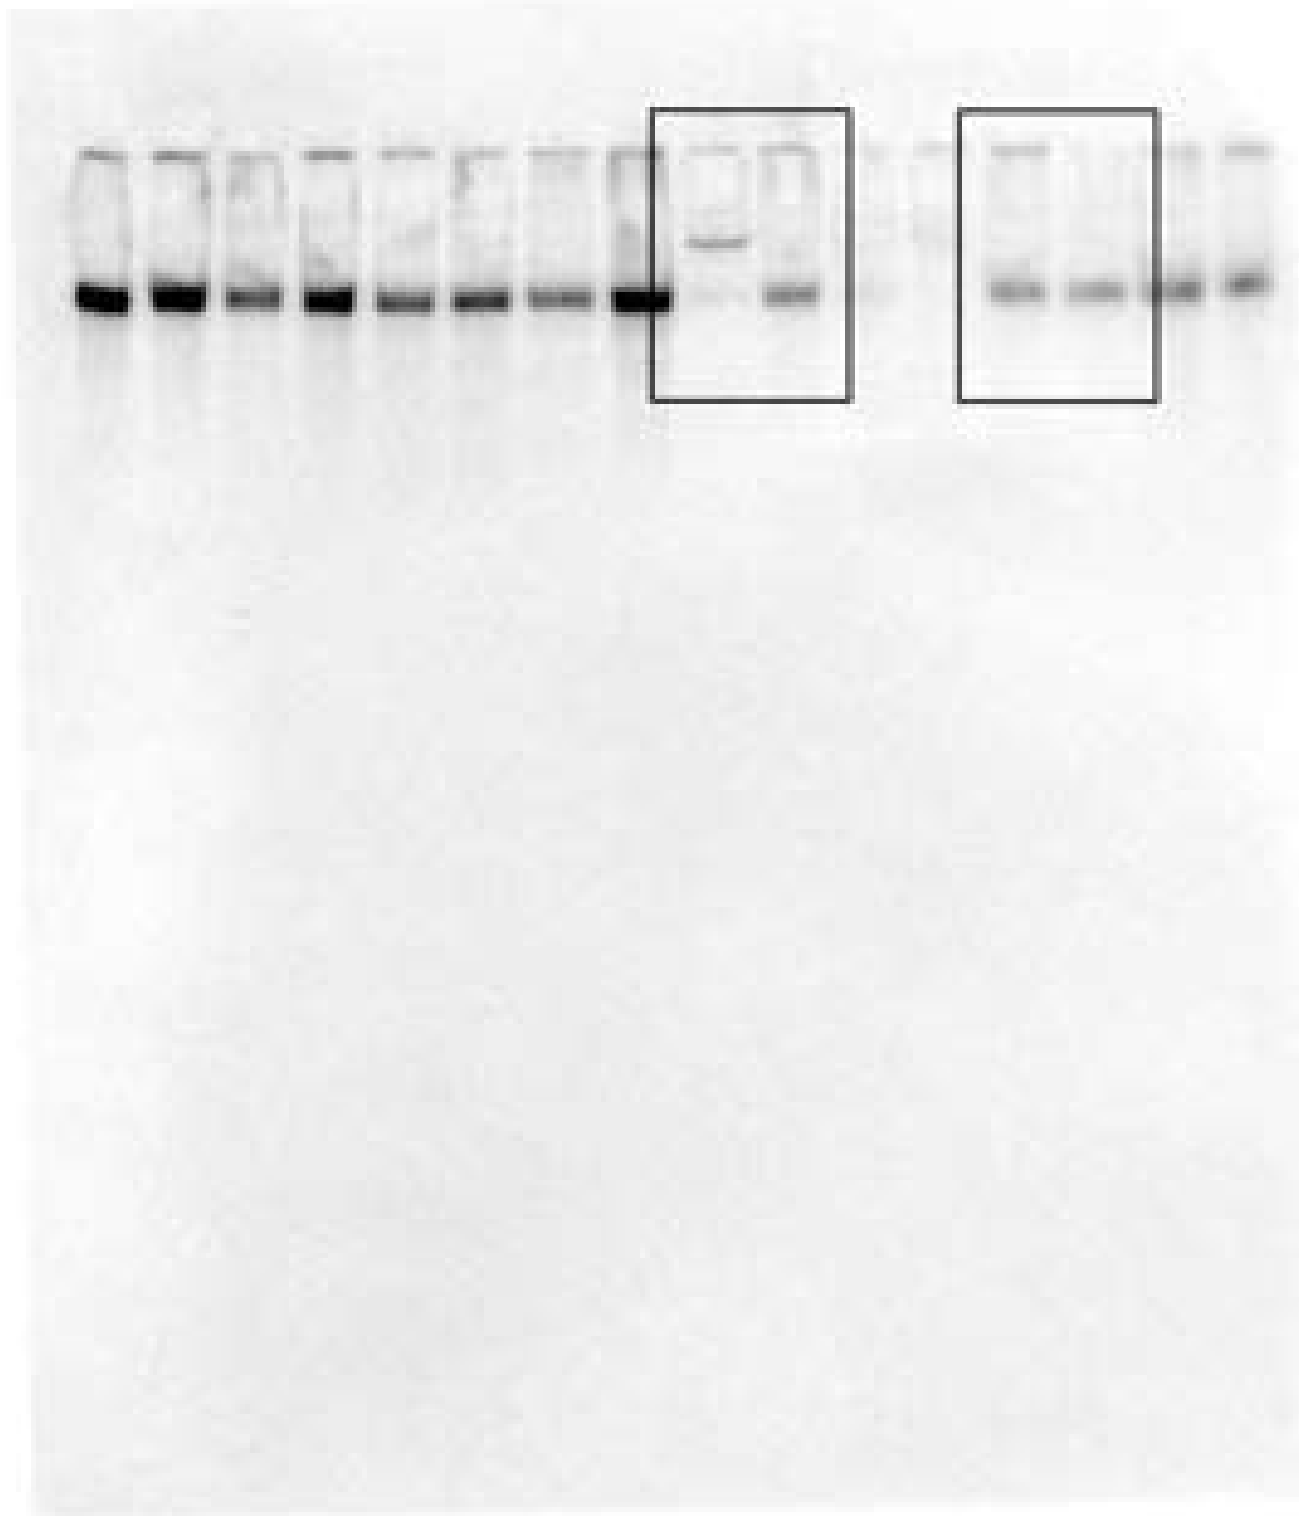

Supplement: emboj2012237s4.pdf [file emboj2012237s4.pdf]
